# Supplementary material
Source: Springer Nature journal article supplement (https://www.springermedizin.de/resource/supplementary/12936_2010_1330_MOESM1_ESM.pdf/9549534)
Supplement: MOESM1 [file 9549534]

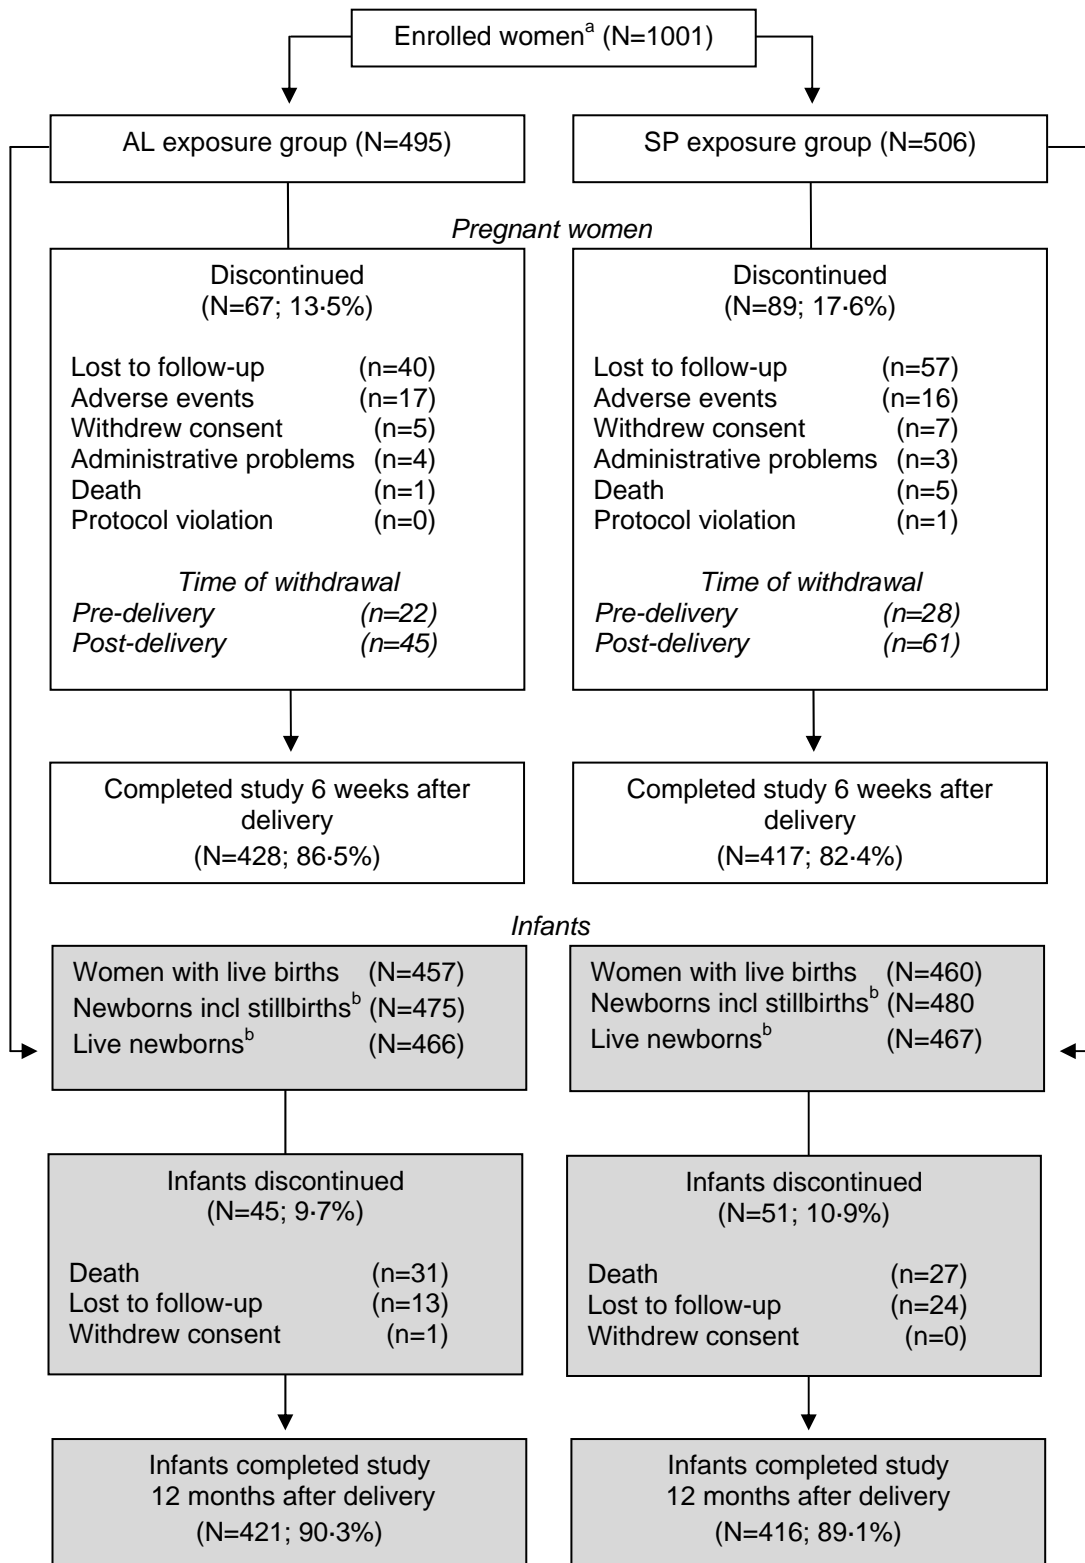

<sup>a</sup> Two women were enrolled although not pregnant – not included here

<sup>b</sup> Larger than the number of mothers due to multiple births – AL exposure group included 9 pairs of twins and SP exposure group included 7 pairs of twins.  
 incl = including
